# Supplementary material
Source: Springer Nature journal article supplement (https://www.springermedizin.de/resource/supplementary/12889_2008_1623_MOESM1_ESM.pdf/9503574)
Supplement: MOESM1 [file 9503574]

Study Population  
N=6,558  
(Table 1)

Non Homeless  
N=5,917

Homeless  
N=641

Subtract 395 cases without  
follow-up or with missing  
values

N=6,163  
(Table 2)

Add 35 cases that were not reported as  
homeless but matched with the DAH  
database

N=676  
(Table 4)

N=652  
(Table 5)

Subtract 24 cases without  
follow-up or with missing  
data

Identified 49 cases who received DAH housing and 49  
controls who did not to compare survival and estimate  
DAH costs per year of life saved.
